# Supplementary material
Source: ML conference proceedings conference paper supplement (https://proceedings.neurips.cc/paper_files/paper/2020/hash/acaa23f71f963e96c8847585e71352d6-Abstract.html)
Supplement: Supplementary file [file acaa23f71f963e96c8847585e71352d6-Supplemental.pdf]

---

# COBE: Contextualized Object Embeddings from Narrated Instructional Video

Supplementary Materials

---

Gedas Bertasius<sup>1</sup>, Lorenzo Torresani<sup>1,2</sup>  
<sup>1</sup>Facebook AI, <sup>2</sup>Dartmouth College

Our supplementary materials consist of:

1. Implementation Details.
2. Ablation Studies.

## 1 Implementation Details

We train our model for 10 epochs with an initial learning rate of 0.001, a linear warmup of 500 steps and a momentum of 0.9. The hyperparameters of RPN and FPN are the same as in [1]. We use a multi-scale training approach implemented by resizing the shorter side of the frame randomly between 400 and 800 pixels. Our model is trained in a distributed setting using 64 GPUs, each GPU holding a single frame. We initialize our model with a Faster R-CNN pretrained on COCO for object detection. During training, we use  $m = 2048$  randomly-sampled negative contextualized embeddings. As our contextual language model, we use a pretrained Conditional Language Transformer Model (CTRL) [2], which we found to be slightly more effective than the other state-of-the-art language models [3, 4, 5, 6, 7]. We freeze the weights of this language model, remove its last layer and add to it a shallow 5-layer MLP which we train jointly with our visual detection model. The contextualized embedding vectors have dimensionality 1280. During inference, we run the bounding box prediction branch on 1000 proposals, apply non-maximum suppression, and use boxes with a score higher than 0.001 as our final output.

## 2 Ablation Studies

**Contextual Language Model.** To investigate the effectiveness of different language models, we evaluate COBE on the manually annotated test split of HowTo100M\_BB using the following state-of-the-art language models: RoBERTa [5], T5 [8], ELECTRA [9], Transformer XL [10], BERT [3], XLNet [6], ALBERT [4], Word2Vec [11], XLM [7], and CTRL [2]. As before the performance of each model variant is evaluated according to the standard mAP detection metric. We present these results in Table 1. These results indicate that the choice of contextual language model in our system can be quite important as the results in Table 1 range from 9.4 mAP to 18.4 mAP, which is a substantial gap. We select the Conditional Transformer Language Model (CTRL) [2] as our choice as it exhibits the best performance on our validation set.

**Negatives per Positive.** Prior work [12, 13] has demonstrated that using a large number of negative samples per positive sample is important for approaches that leverage NCE loss [14]. Here, we validate this finding in our setting and present these results in the last three rows of Table 1. Specifically, we experiment with the negative to positive sample ratio of 128, 512 and 2048. We observe that using a large number of negative samples per one positive sample yields considerably better performance. We

Table 1: Here, we study the effectiveness of different language models used to train our visual detection model. The ablation studies are conducted on the test set of HowTo100M\_BB dataset. We evaluate the performance of each baseline using the same mean average precision metric as before. Based on these results, we note that the Conditional Transformer Language Model (CTRL) [2] achieves the best accuracy so we adopt it as our contextual language model. Furthermore, we also investigate how the negative-to-positive sample ratio during training affects our model’s performance. As expected, a larger number of negative per single positive sample leads to better results.

| Language Model      | Training Data | Negatives per Positive | Eval. Set         | mAP         |
|---------------------|---------------|------------------------|-------------------|-------------|
| RoBERTa [5]         | HowTo100M_BB  | 2048                   | HowTo100M_BB_test | 9.4         |
| T5 [8]              | HowTo100M_BB  | 2048                   | HowTo100M_BB_test | 14.1        |
| ELECTRA [9]         | HowTo100M_BB  | 2048                   | HowTo100M_BB_test | 14.5        |
| Transformer XL [10] | HowTo100M_BB  | 2048                   | HowTo100M_BB_test | 15.3        |
| BERT [3]            | HowTo100M_BB  | 2048                   | HowTo100M_BB_test | 16.2        |
| XLNet [6]           | HowTo100M_BB  | 2048                   | HowTo100M_BB_test | 16.3        |
| Word2Vec [11]       | HowTo100M_BB  | 2048                   | HowTo100M_BB_test | 16.7        |
| ALBERT [4]          | HowTo100M_BB  | 2048                   | HowTo100M_BB_test | 16.9        |
| XLM [7]             | HowTo100M_BB  | 2048                   | HowTo100M_BB_test | 18.0        |
| CTRL [2]            | HowTo100M_BB  | 128                    | HowTo100M_BB_test | 13.6        |
| CTRL [2]            | HowTo100M_BB  | 512                    | HowTo100M_BB_test | 15.5        |
| CTRL [2]            | HowTo100M_BB  | 2048                   | HowTo100M_BB_test | <b>18.4</b> |

note that we have not experimented with even larger negative samples as it slows down the training, but we will attempt to do so in our future work.

## References

- [1] Kaiming He, Georgia Gkioxari, Piotr Dollár, and Ross Girshick. Mask R-CNN. In *Proceedings of the International Conference on Computer Vision (ICCV)*, 2017.
- [2] Nitish Shirish Keskar, Bryan McCann, Lav Varshney, Caiming Xiong, and Richard Socher. CTRL - A Conditional Transformer Language Model for Controllable Generation. *arXiv preprint arXiv:1909.05858*, 2019.
- [3] Jacob Devlin, Ming-Wei Chang, Kenton Lee, and Kristina Toutanova. BERT: Pre-training of deep bidirectional transformers for language understanding. In *Proceedings of the 2019 Conference of the North American Chapter of the Association for Computational Linguistics: Human Language Technologies, Volume 1 (Long and Short Papers)*, 2019.
- [4] Zhenzhong Lan, Mingda Chen, Sebastian Goodman, Kevin Gimpel, Piyush Sharma, and Radu Soricut. Albert: A lite bert for self-supervised learning of language representations. In *International Conference on Learning Representations*, 2020.
- [5] Yinhan Liu, Myle Ott, Naman Goyal, Jingfei Du, Mandar Joshi, Danqi Chen, Omer Levy, Mike Lewis, Luke Zettlemoyer, and Veselin Stoyanov. RoBERTa: A robustly optimized BERT pretraining approach. *arXiv preprint arXiv:1907.11692*, 2019.
- [6] Zhilin Yang, Zihang Dai, Yiming Yang, Jaime Carbonell, Russ R Salakhutdinov, and Quoc V Le. Xlnet: Generalized autoregressive pretraining for language understanding. In *Advances in Neural Information Processing Systems 32*, pages 5753–5763. 2019.
- [7] Alexis Conneau, Kartikay Khandelwal, Naman Goyal, Vishrav Chaudhary, Guillaume Wenzek, Francisco Guzmán, Edouard Grave, Myle Ott, Luke Zettlemoyer, and Veselin Stoyanov. Unsupervised cross-lingual representation learning at scale. *arXiv preprint arXiv:1911.02116*, 2019.
- [8] Colin Raffel, Noam Shazeer, Adam Roberts, Katherine Lee, Sharan Narang, Michael Matena, Yanqi Zhou, Wei Li, and Peter J. Liu. Exploring the limits of transfer learning with a unified text-to-text transformer. *arXiv e-prints*, 2019.
- [9] Kevin Clark, Minh-Thang Luong, Quoc V. Le, and Christopher D. Manning. ELECTRA: pre-training text encoders as discriminators rather than generators. In *8th International Conference on Learning Representations, ICLR 2020, Addis Ababa, Ethiopia, April 26-30, 2020*, 2020.
- [10] Zihang Dai, Zhilin Yang, Yiming Yang, Jaime Carbonell, Quoc Le, and Ruslan Salakhutdinov. Transformer-XL: Attentive language models beyond a fixed-length context. In *Proceedings of the 57th Annual Meeting of the Association for Computational Linguistics*, 2019.

- [11] Tomas Mikolov, Ilya Sutskever, Kai Chen, Greg S Corrado, and Jeff Dean. Distributed representations of words and phrases and their compositionality. In *Advances in Neural Information Processing Systems 26*, pages 3111–3119. 2013.
- [12] Antoine Miech, Dimitri Zhukov, Jean-Baptiste Alayrac, Makarand Tapaswi, Ivan Laptev, and Josef Sivic. HowTo100M: Learning a Text-Video Embedding by Watching Hundred Million Narrated Video Clips. In *ICCV*, 2019.
- [13] Aäron van den Oord, Yazhe Li, and Oriol Vinyals. Representation learning with contrastive predictive coding. *CoRR*, abs/1807.03748, 2018.
- [14] Michael Gutmann and Aapo Hyvärinen. Noise-contrastive estimation: A new estimation principle for unnormalized statistical models. In *Proceedings of the Thirteenth International Conference on Artificial Intelligence and Statistics*, pages 297–304, 2010.
